# Supplementary material for: HMGB1 released from intestinal epithelia damaged by cholera toxin adjuvant contributes to activation of mucosal dendritic cells and induction of intestinal cytotoxic T lymphocytes and IgA
Source: PubMed Central journal article supplement (PMC5967345; doi:10.1038/s41419-018-0665-z), 2018-05-24

**Fig. S1**

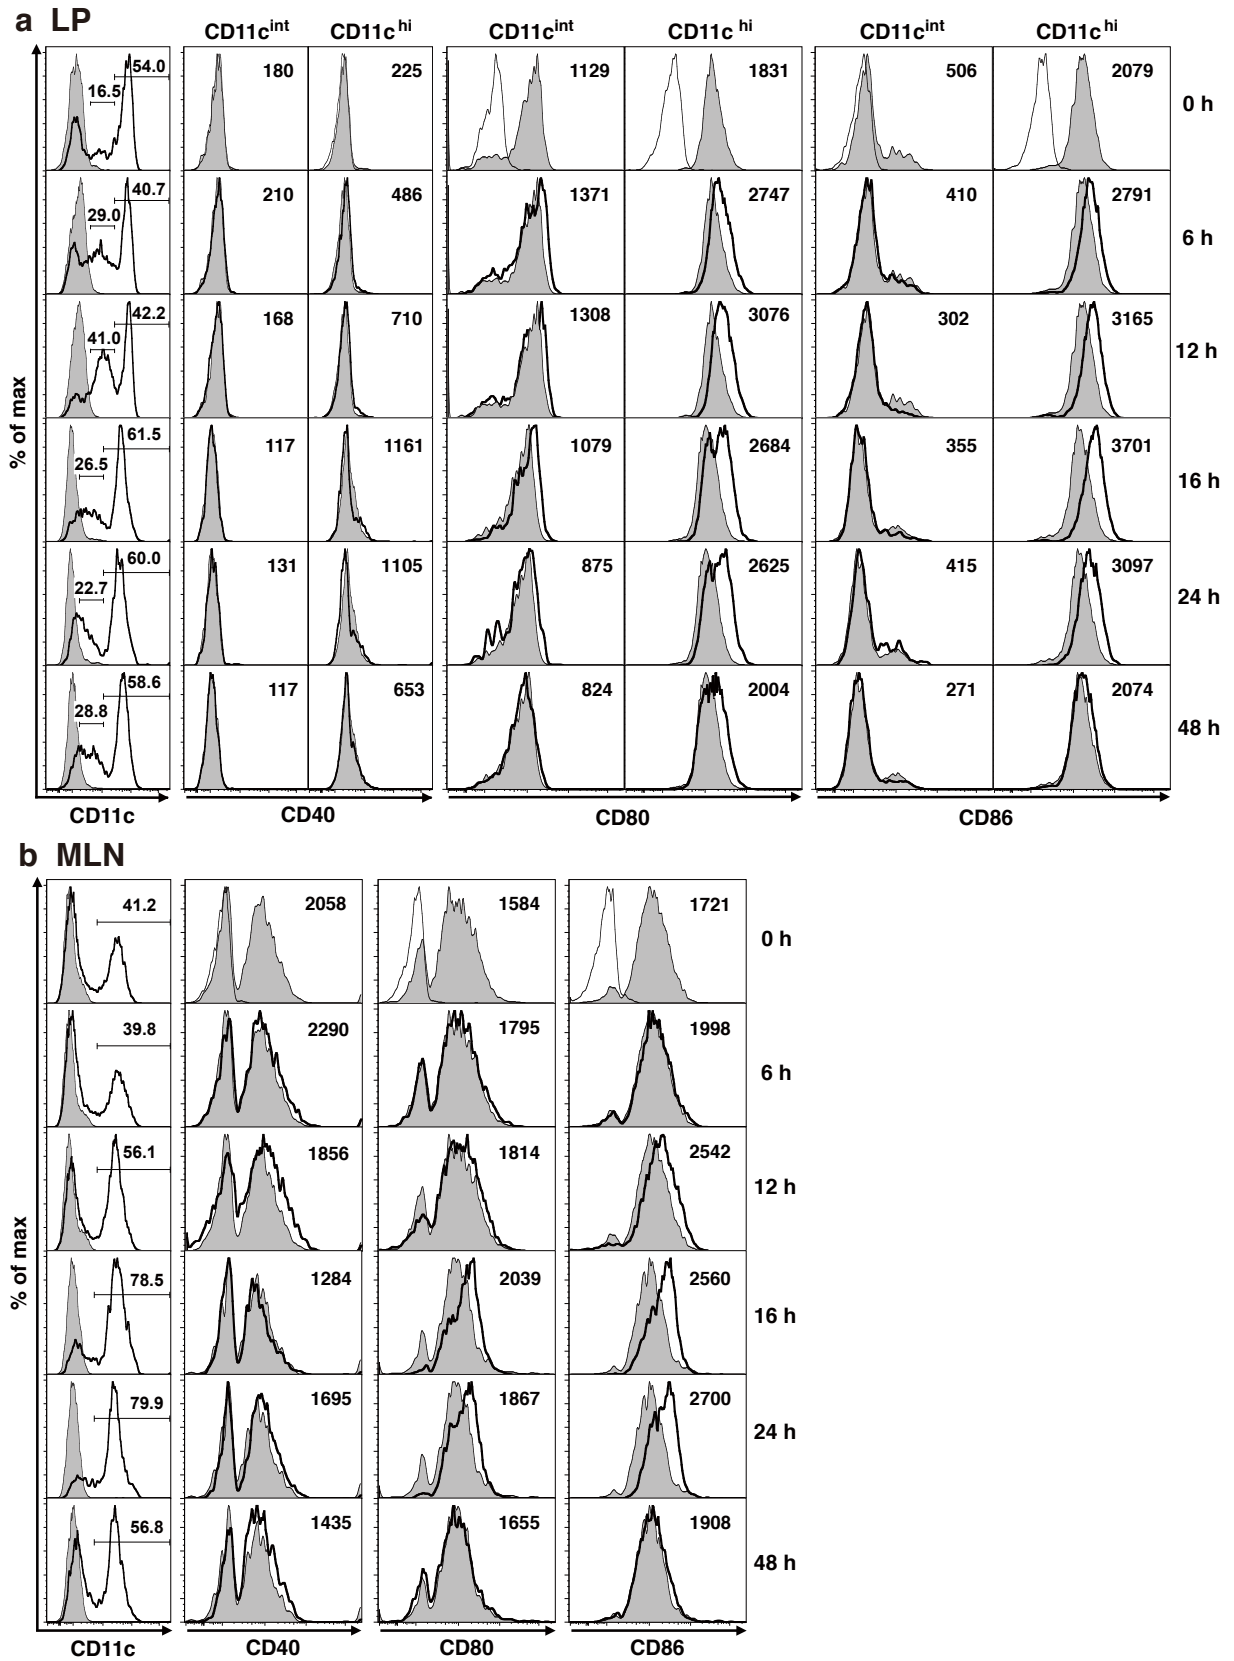

**Fig. S2**

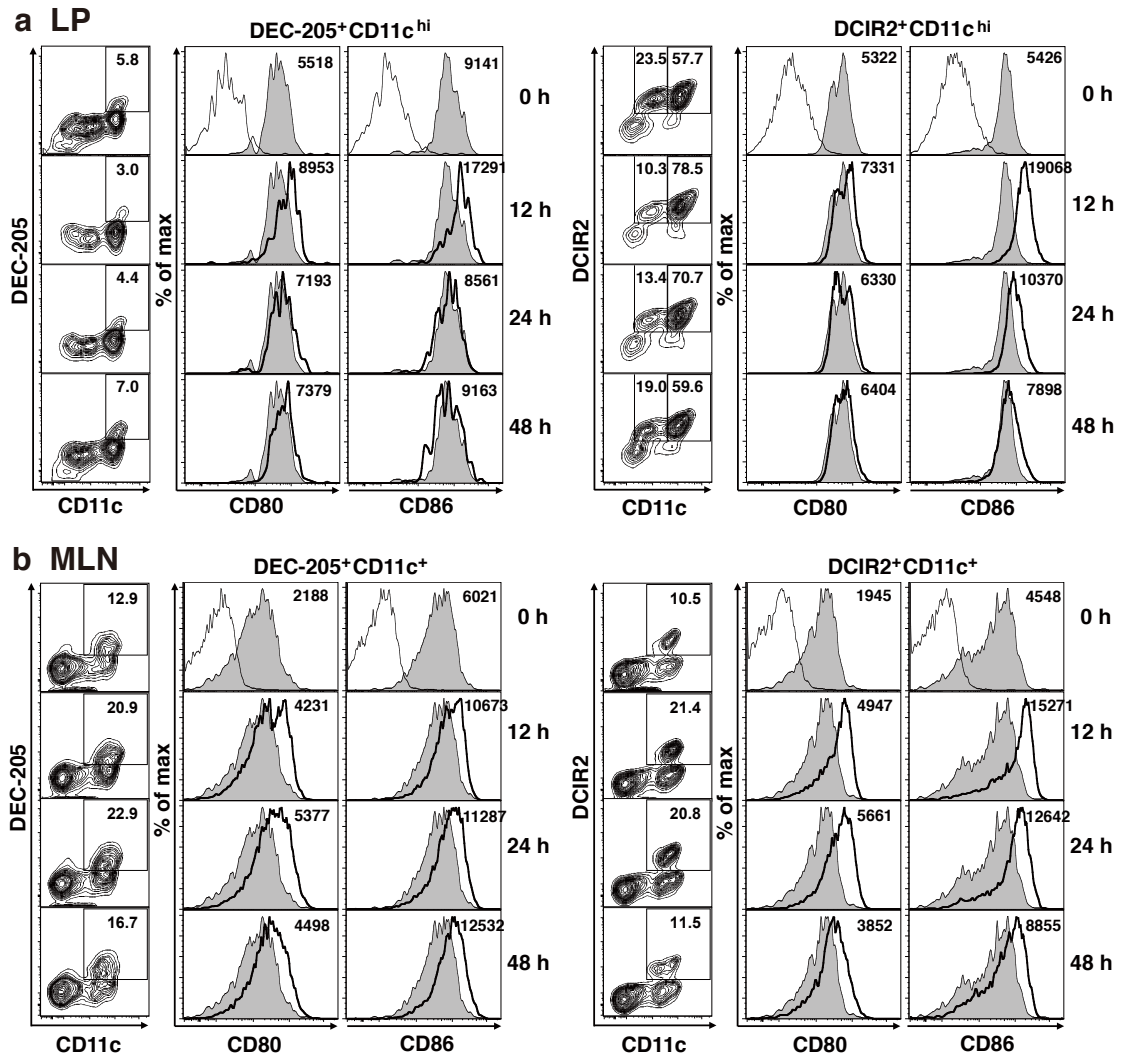

Fig. S3

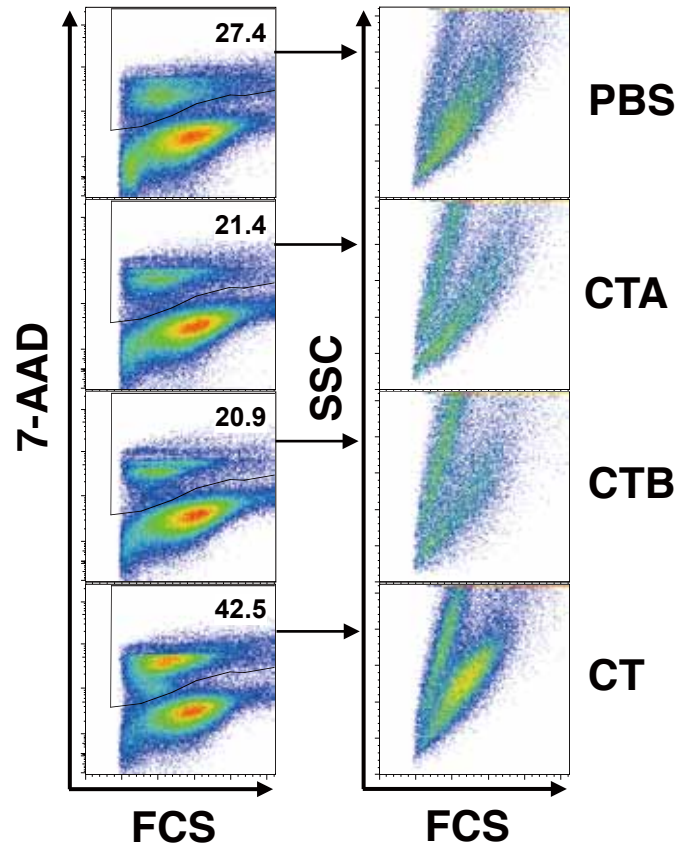

**Fig. S4**

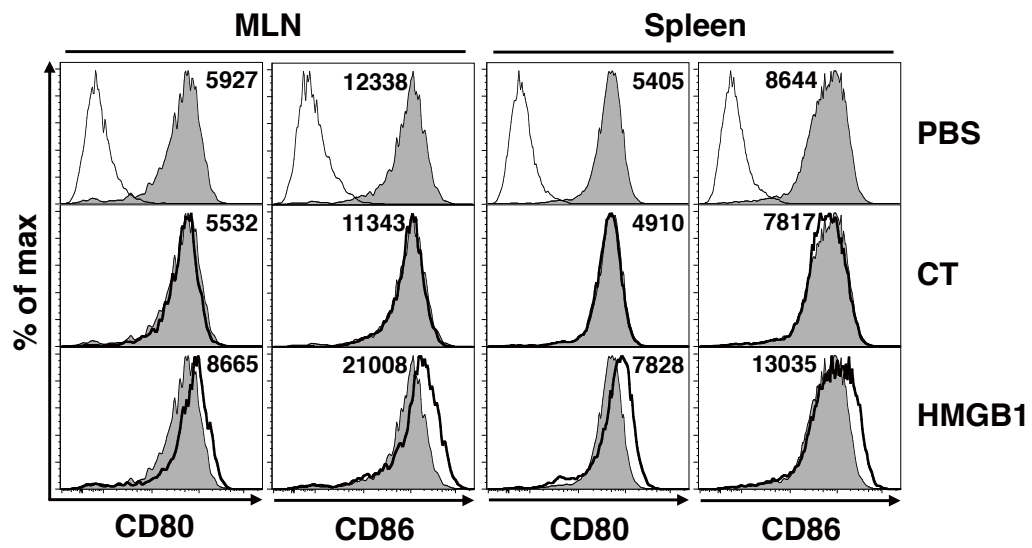

**Fig. S5**

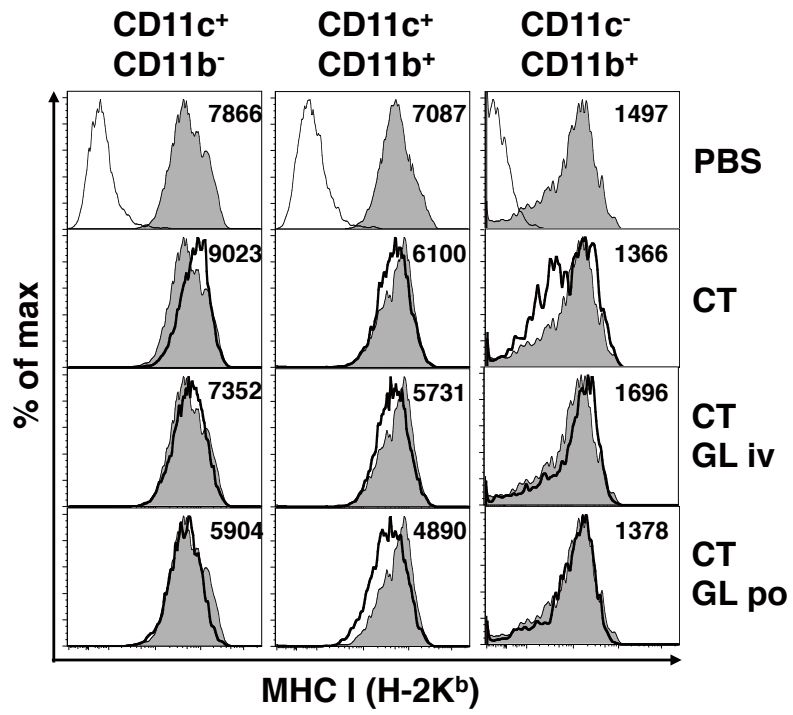

Supplement: 41419_2018_665_MOESM1_ESM.pdf [file 41419_2018_665_MOESM1_ESM.pdf]
